# Supplementary material for: Serum Metabolic Profiling Reveals Potential Anti-Inflammatory Effects of the Intake of Black Ginseng Extracts in Beagle Dogs
Source: MDPI journal article supplement (doi:10.3390/molecules25163759), 2020-08-18
Supplement: s1 [file s1]

# Serum Metabolic Profiling Reveals Potential Anti-Inflammatory Effects of the Intake of Black Ginseng Extracts in Beagle Dogs

Ye Jin Kim <sup>1,†</sup>, Dae Young Lee <sup>2,†</sup>, Ho-Eun Park <sup>3</sup>, Dahye Yoon <sup>2</sup>, Bumkyu Lee <sup>4</sup>, Jae Geun Kim <sup>1</sup>, Kyung-Hoan Im <sup>1</sup>, Young-Seob Lee <sup>2</sup>, Wan-Kyu Lee<sup>3</sup>, and Jae Kwang Kim <sup>1,\*</sup>

<sup>1</sup> Division of Life Sciences, College of Life Sciences and Bioengineering, Incheon National University, Yeonsugu, Incheon 22012, Republic of Korea; 201721047@inu.ac.kr (Y.J.K.); jgkim@inu.ac.kr (J.G.K.); khim61@inu.ac.kr (K.-H.I.); kjkpj@inu.ac.kr (J.K.K.)

<sup>2</sup> Department of Herbal Crop Research, National Institute of Horticultural and Herbal Science, RDA, Eumseong 27709, Republic of Korea; dylee0809@gmail.com (D.Y.L.); dahyeyoon@korea.kr (D.Y.); youngseoblee@korea.kr (Y.-S.L.)

<sup>3</sup> College of Veterinary Medicine, Chungbuk National University, Cheongju 28644, Republic of Korea; phu4793@naver.com (H.-E.P.); wklee@chungbuk.ac.kr (W.-K.L.)

<sup>4</sup> Department of Environment Science & Biotechnology, Jeonju University, Jeonju 55069, Republic of Korea; leebk@jj.ac.kr (B.L.)

\* Correspondence: kjkpj@inu.ac.kr; Tel: +82-32-835-8241

† These authors contributed equally to this work.

---

## Supplementary File

**Figure S1.** Black ginseng that has been dried three times after being steam cooked three times

**Figure S2.** Identification of ginsenosides in black ginseng extract by high-performance liquid chromatography (HPLC) analysis.

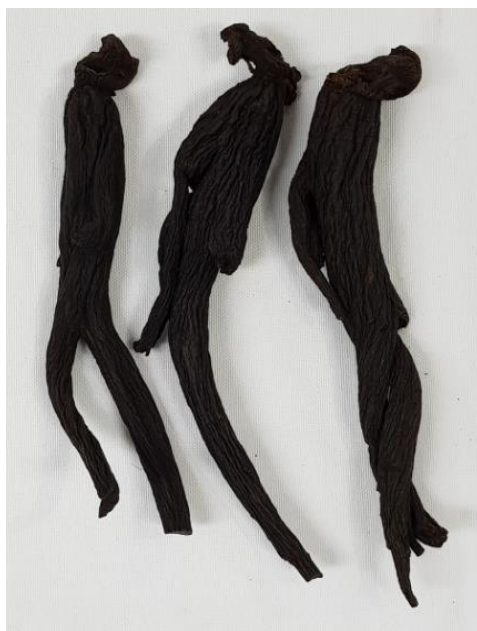

**Figure S1.** Black ginseng that has been dried three times after being steam cooked three times.

**(A) Standard mixture**

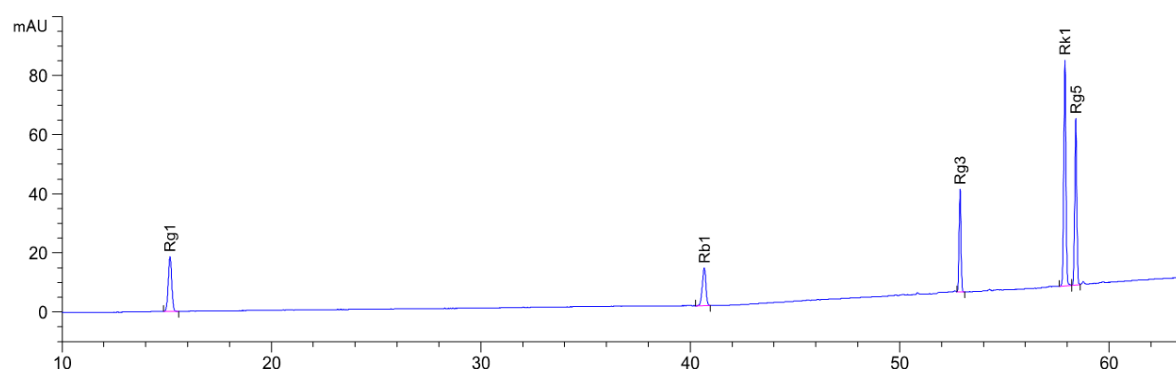

**(B) Extract of black ginseng**

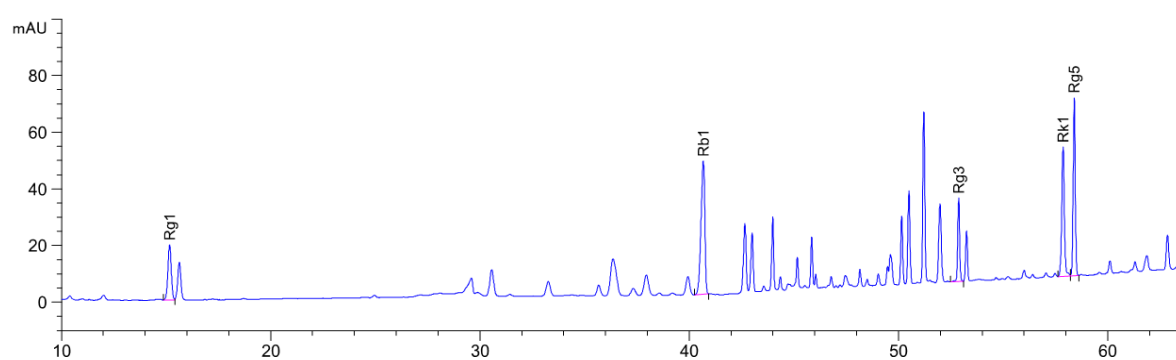

**Figure S2.** Identification of ginsenosides in black ginseng extract by high-performance liquid chromatography (HPLC) analysis.
